# Supplementary material for: Low-Fat Versus Low-Carbohydrate Weight Reduction Diets: Effects on Weight Loss, Insulin Resistance, and Cardiovascular Risk: A Randomized Control Trial
Source: PubMed Central journal article supplement — Diabetes. 2009 Aug 31;58(12):2741–8. doi: 10.2337/db09-0098 (PMC2780863; doi:10.2337/db09-0098), 2009-08-31

**Supplemental FIGURE S1**

Assessment of glucose levels during Meal Tolerance Tests at baseline and following the hypocaloric low-carbohydrate and low-fat diets

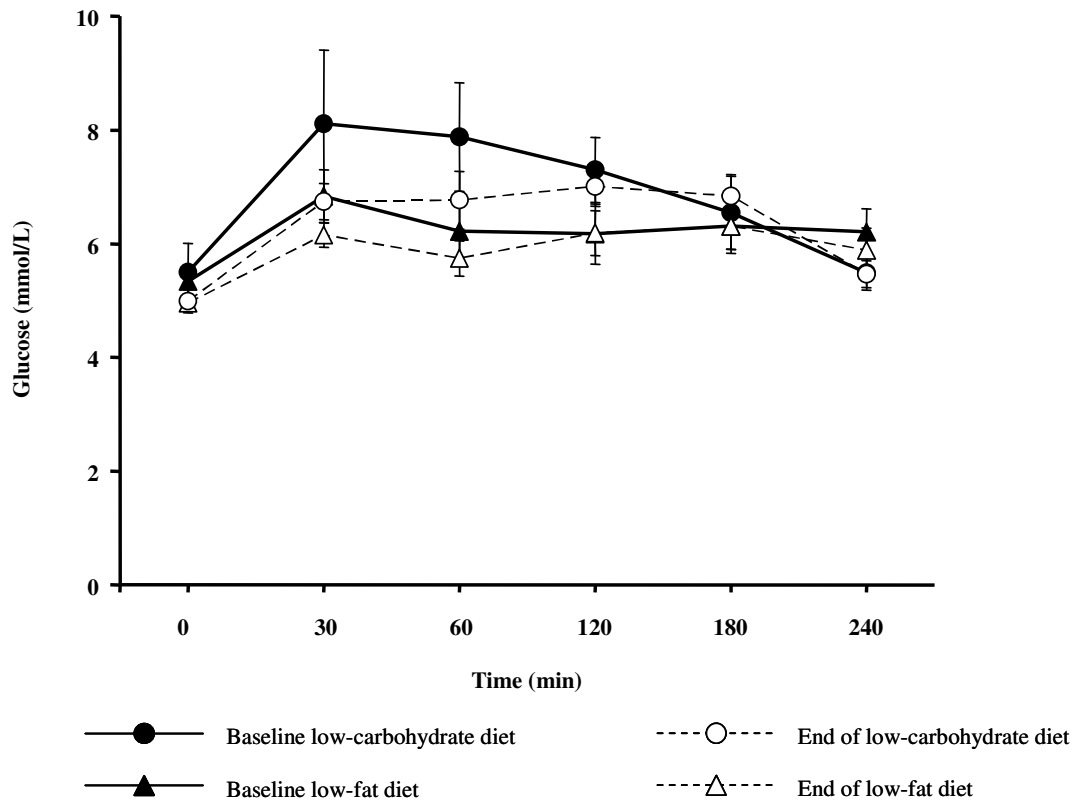

**Supplemental FIGURE S2**

Assessment of triglycerides during Meal Tolerance Test at baseline and following the hypocaloric low-carbohydrate and low-fat diets

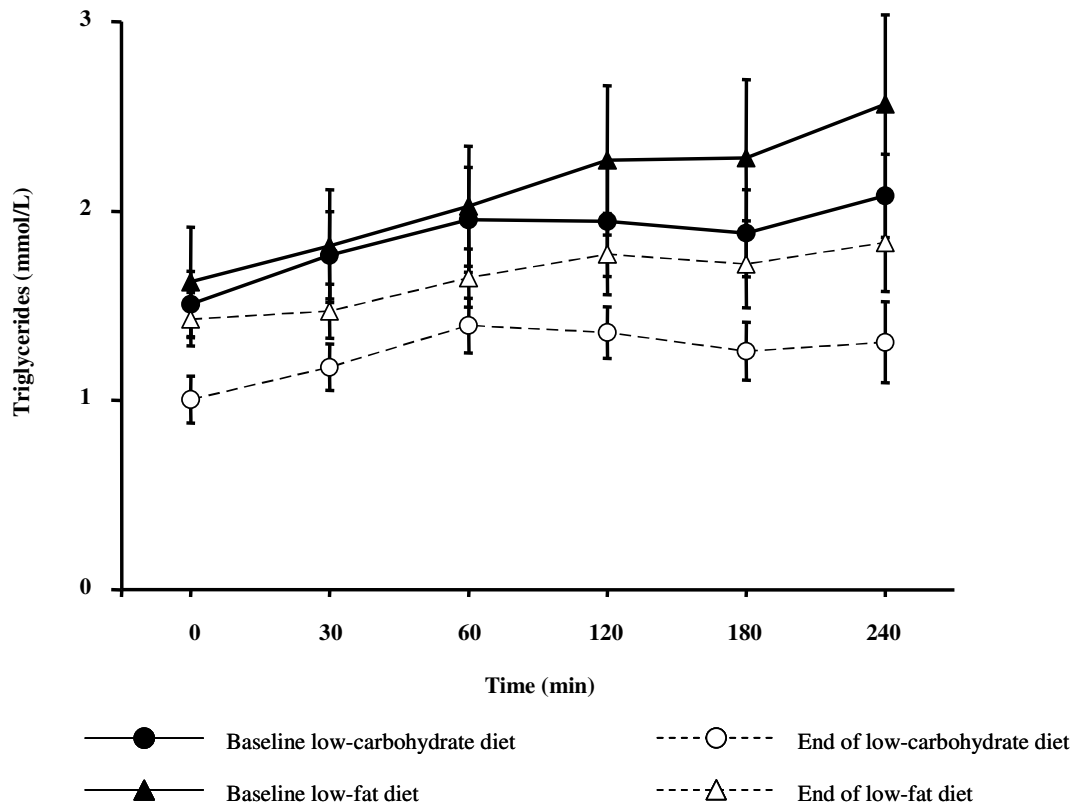

Supplement: supp_db09-0098_db09-0098_Online_appendix.pdf [file supp_db09-0098_db09-0098_Online_appendix.pdf]
